# Supplementary material for: Localization and dynamics of amylose–lipophilic molecules inclusion complex formation in starch granules
Source: Royal Society of Chemistry journal article supplement (doi:10.1039/c4cp05001k), 2015-01-01
Supplement: c4cp05001k1.pdf [file c4cp05001k1.pdf]

# Localization and dynamics of amylose-lipophilic molecules inclusion complex formation in starch granules

Marianna Manca<sup>a</sup>, Albert J. J. Woortman<sup>a</sup>, Andrea A. Mura<sup>b</sup>, Katja Loos<sup>a\*</sup> and Maria Antonietta Loi<sup>a\*</sup>

## Supplementary Information

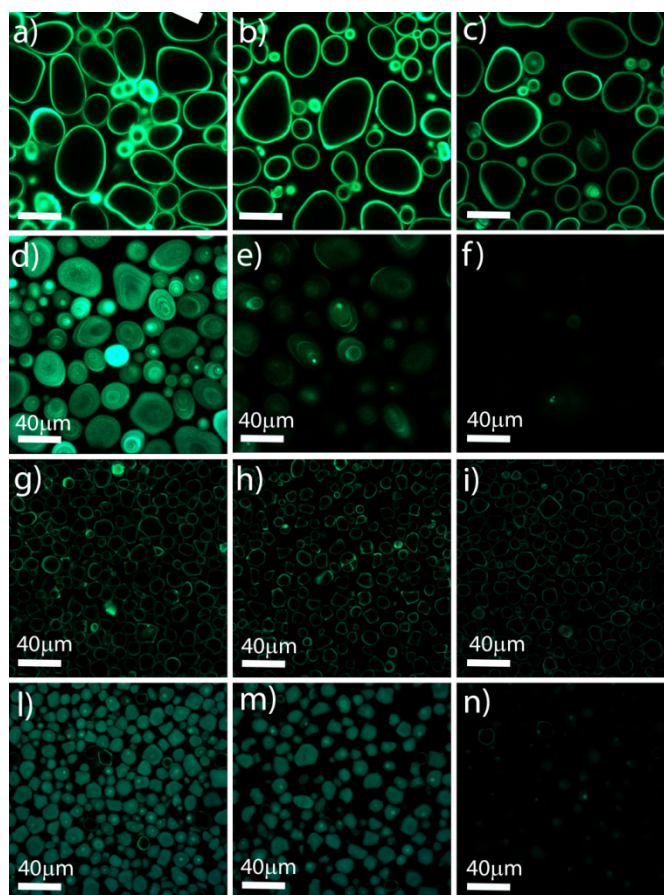

**Fig. S1:** CLSM images of regular potato (a), waxy potato (d), regular corn (g) and waxy corn (l) starch granules in suspension 7 days after the addition of 5-hexadecanoylamino fluorescein molecules. The images b, e, h, m refer to the same starch species acquired after the “washing” procedure with 50% DMF. The images c, f, i, n refer to the same starch species acquired after the “washing” procedure with 90% DMF.

---
